# Supplementary material for: Biological and Genetic Heterogeneity in Trypanosoma dionisii Isolates from Hematophagous and Insectivorous Bats
Source: MDPI journal article supplement (doi:10.3390/pathogens9090736), 2020-09-07

**Supplementary Table S1:** The sequence analysis of DNA products obtained with the three molecular targets in comparison with DNA sequences of *Trypanosoma* spp. deposited in GenBank confirmed the identification of the three isolates as *Trypanosoma dionisii*.

| Molecular target | Samples | Identity (%) | Query cover (%) | Reference sequence ( <i>T. dionisii</i> ) |
|------------------|---------|--------------|-----------------|-------------------------------------------|
| 18S rDNA         | M1011   | 100          | 100             | KF557744                                  |
|                  | M1014   | 99.84        | 100             | KF557750                                  |
|                  | M1015   | 99.84        | 100             | KF557750                                  |
| <i>gGAPDH</i>    | M1011   | 99.29        | 100             | GQ140362                                  |
|                  | M1014   | 100          | 100             | MG471432                                  |
|                  | M1015   | 100          | 100             | MG471432                                  |
| <i>Cytb</i>      | M1011   | 100          | 100             | KF557750                                  |
|                  | M1014   | 100          | 95              | MG471432                                  |
|                  | M1015   | 100          | 94              | FJ900251                                  |

For all sequences e-value = 0.0

**Supplementary Figure S1:** Schematic representation of the isoenzyme patterns for glucose phosphate isomerase (GPI), malate dehydrogenase (MDH), isocitrate dehydrogenase (IDH), malic enzyme (ME). A – *Trypanosoma rangeli* (Choachi), B–C– *Trypanosoma c. cruzi* (Y, CL Brener), D – *Trypanosoma desterrensis*, E, F and G – *Trypanosoma dionisii* (M1011, M1014, M1015).

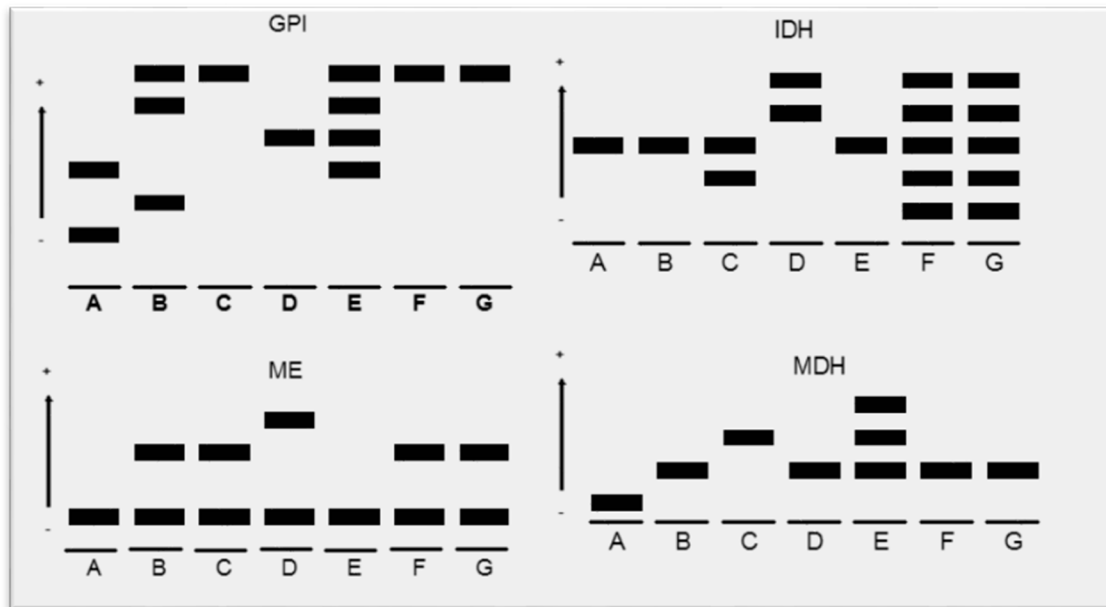

**Supplementary Figure S2:** Phylogenetic analyses demonstrating the clear separation of *Trypanosoma dionisii* isolates into two groups. Phylogenetic tree inferred by Maximum likelihood with the Tamura–Nei model of partial sequences of cytochrome b genes of *T. dionisii* from this study and reference sequences deposited in GenBank were aligned with the Molecular Evolutionary Genetics Analysis (MEGA) program version 7.0.26. Outgroup: *Trypanosoma rangeli*. Bootstrap test results (1000 replicates) are shown next to the branches GenBank accession numbers are shown in Table 1.

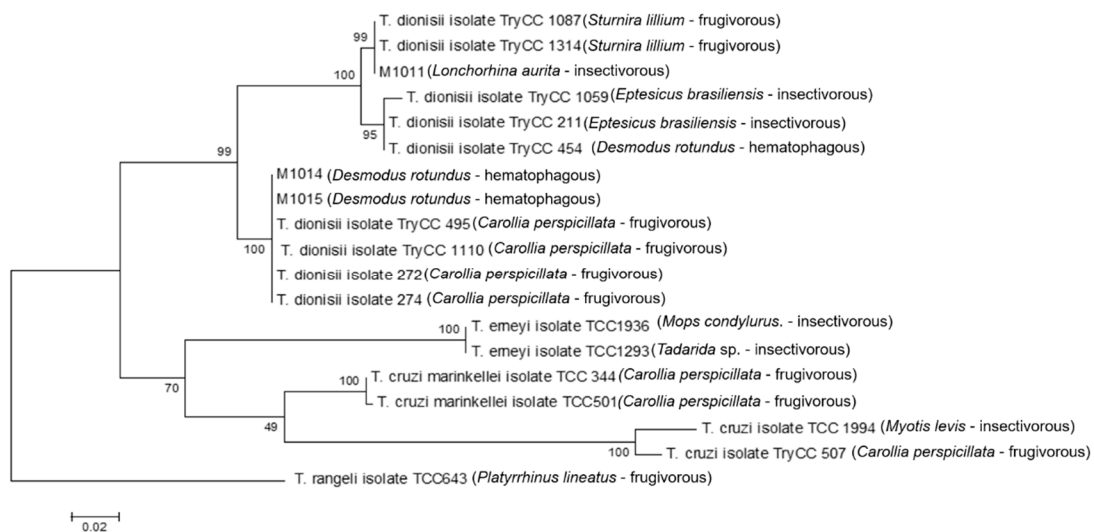

**Supplementary Figure S3:** Unweighted pair group method using arithmetic averages (UPGMA) dendrogram built with the simple matching coefficient of similarity based on the genetic profiles obtained from Random Amplified Polymorphic (RAPD) among isolates. *T. dionisii* M1011 was clustered separated M1014 and M1015 samples. *T. c. cruzi* Y, *T. cruzi* ClBrenner, *T. rangeli* Choachi and *T. desterrensis* were used as reference and were clustered totally separated of the *T. dionisii* samples.

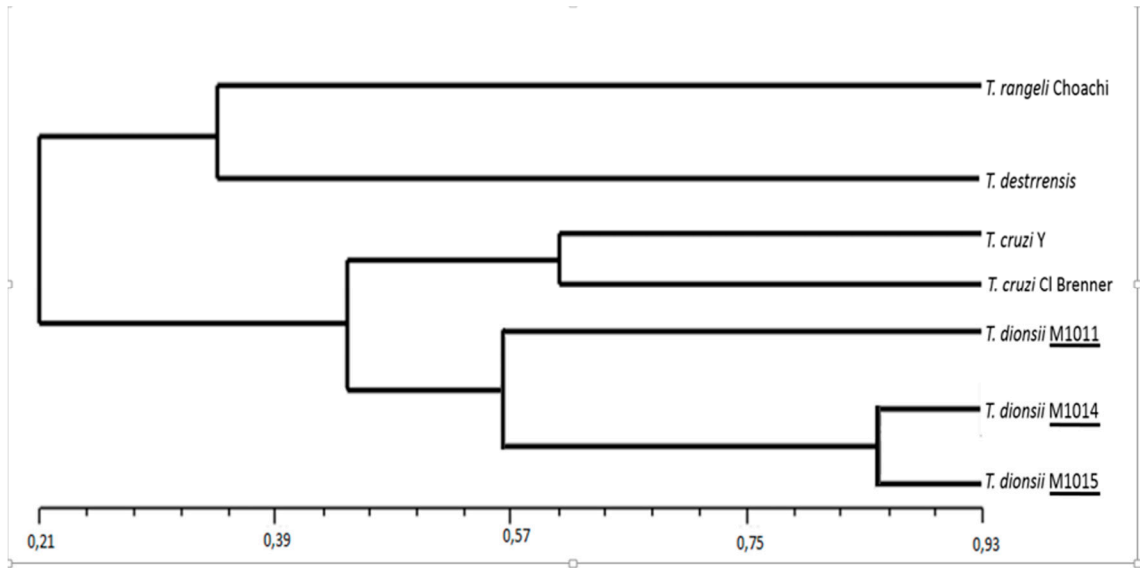

**Supplementary Graphic S1:** Body and flagellum measurements of parasites used in morphometric analysis. A. M1011, B. M1014.

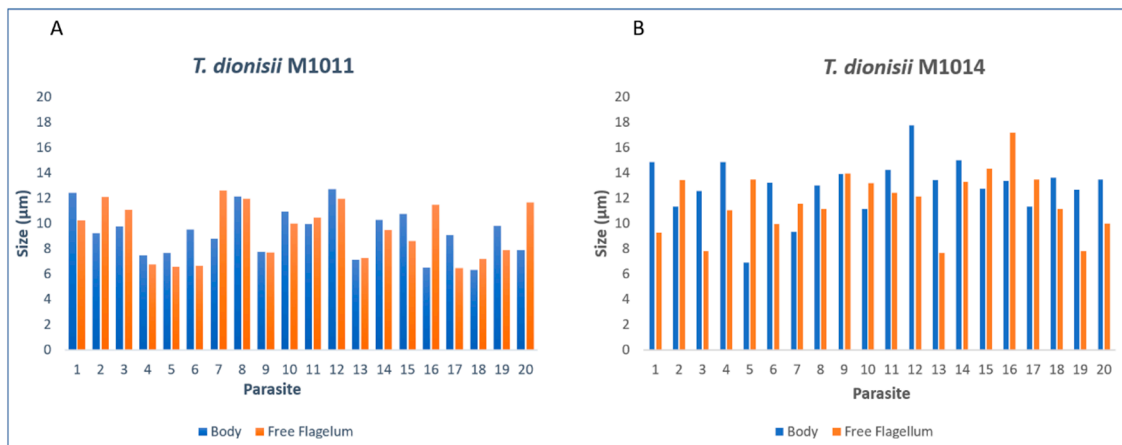

Supplement: s1 [file s1]
